# Supplementary material for: Characterization and Outcomes of SARS-CoV-2 Infection in Patients with Sarcoidosis
Source: MDPI journal article supplement (doi:10.3390/v13061000), 2021-05-27
Supplement: s1 [file s1]

**Table S1.** Previous studies reporting SARS-CoV-2 infection in patients with sarcoidosis.

| First author        | Country       | Study design                         | Patients with sarcoidosis (n) | COVID-19 (n) | %    | Hospital admission (n) | %2    | ICU admission | %3    | Death | %4         | SARS-CoV-2 confirmed |
|---------------------|---------------|--------------------------------------|-------------------------------|--------------|------|------------------------|-------|---------------|-------|-------|------------|----------------------|
| Present study       | Spain         | Nationwide cohort                    | 878                           | 45           | 5,13 | 14                     | 31,11 | 2             | 14,29 | 4     | 28,57<br>1 | PCR in 43            |
| Jeny et al          | France        | Nationwide cohort                    | nd                            | 36           | nd   | 28                     | 77,78 | 13 of 28      | 46,43 | 5     | 17,85<br>7 | PCR in 34            |
| Morgenthau et al    | US            | Cross-sectional in COVID-19          | nd                            | 37           | nd   | 22                     | 59,46 | 9 of 22       | 40,91 | 6     | 27,27<br>3 | PCR                  |
| Baughman et al      | International | Survey in patients from associations | nd                            | 116          | nd   | 18 of 114              | 15,79 | 6 of 18       | 33,33 | nd    | nd         | Not defined          |
| Gianfrancesco et al | International | Observational                        | nd                            | 41           | nd   | nd                     | nd    | nd            | nd    | nd    | nd         | PCR                  |
| Kiani et al         | Iran          | Observational                        | nd                            | 10           | nd   | 0                      | 0,00  | 0             | 0,00  | 0     | 0          | PCR                  |
| Mananasala et al    | US            | Observational                        | 238                           | 5            | 2,10 | 3                      | 60,00 | 2 of 3        | 66,67 | 1     | 33,33<br>3 | PCR                  |
| Ramdani et al       | Morocco       | Case report                          | nd                            | 1            | nd   | 1                      | na    | 0             | na    | 0     | na         | PCR                  |
| Opoca et al         | Poland        | Case report                          | nd                            | 1            | nd   | 1                      | na    | 1             | na    | 0     | na         | PCR                  |
| Padala et al        | US            | Case report                          | nd                            | 1            | nd   | 1                      | na    | 1             | na    | 0     | na         | PCR                  |
| Bénezit et al       | France        | Case report                          | nd                            | 1            | nd   | 1                      | na    | 0             | na    | 0     | na         | PCR                  |
| Gyorfi et al        | Germany       | Case report                          | nd                            | 1            | nd   | 1                      | na    | 0             | na    | 0     | na         | PCR                  |
| Ng et al            | US            | Case report                          | nd                            | 1            | nd   | 1                      | na    | 1             | na    | 1     | na         | PCR                  |
